# Supplementary material
Source: PubMed Central journal article supplement (PMC3090511)

## Supplementary Information

**Supplement Figure 1** hMSC cell attachment to 4°C, 25°C, 76°C, 100°C water annealed silk films. Confocal microscopy images at 60 minutes and 3 days. Bar length: 200  $\mu$ m.

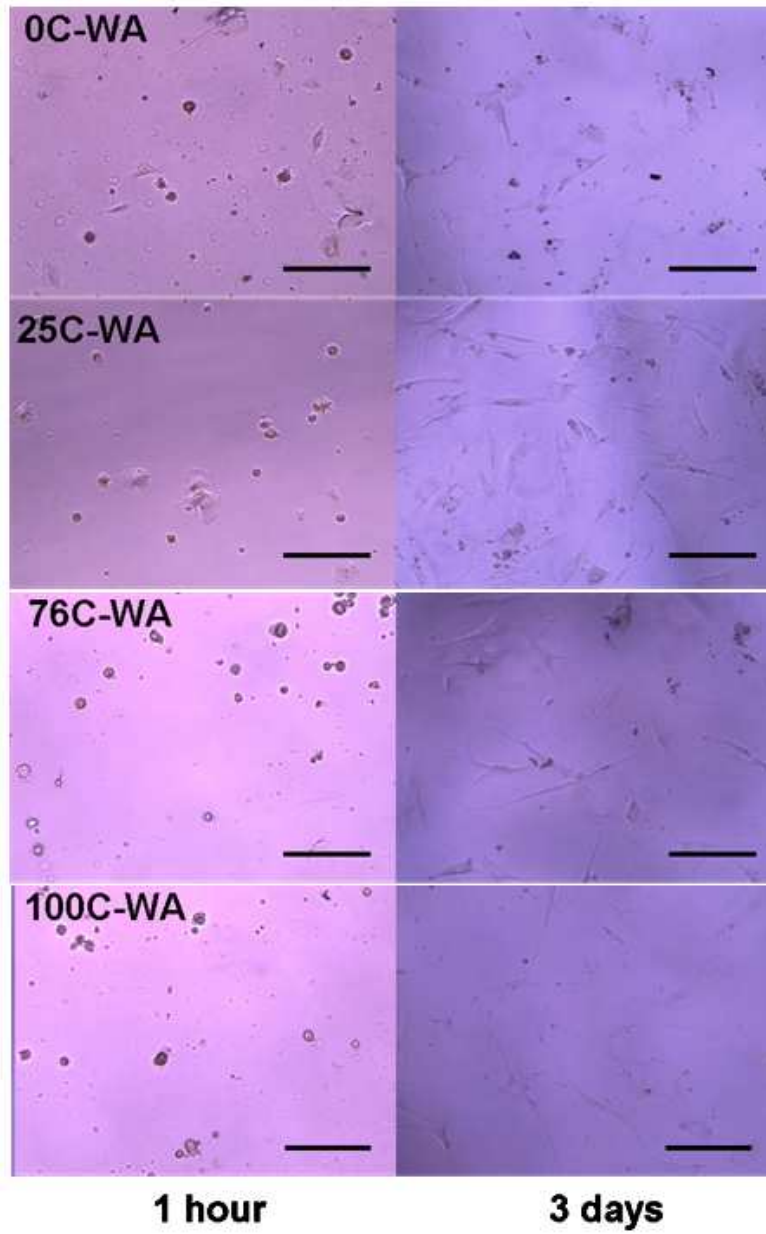

Supplement: NIHMS283030-supplement-1_si_001.pdf [file NIHMS283030-supplement-1_si_001.pdf]
